# Supplementary material
Source: PubMed Central journal article supplement (PMC8115730)
Supplement: NIHMS1693618-supplement-Supplementary_Data.pdf [file NIHMS1693618-supplement-Supplementary_Data.pdf]

---

**Supplementary information**

---

**Mechanisms controlling pancreatic islet cell function in insulin secretion**

---

In the format provided by the authors and unedited

## 1 **Supplementary Box 1. $\beta$ -cell secretory granule trafficking**

2 Insulin secretory granules, like synaptic vesicles, dock to the plasma membrane and then undergo  
3 priming to become readily-releasable granules. Loading of granules at the plasma membrane  
4 (PM) is accomplished by a set of four proteins, three soluble N-ethylmaleimide-sensitive factor  
5 attachment protein receptor (SNARE) proteins and sec1/Munc18, which assemble into a  
6 quaternary complex to place the granule at the PM<sup>1</sup>. The three SNARE proteins involved in the  
7 quaternary complex are syntaxin 1A, synaptosome-associated protein of 25 kDa (SNAP25), and  
8 vesicle associated protein (VAMP)-2. Phosphorylation of Munc18 by PKC causes activation of  
9 syntaxin 1A, facilitating its binding to SNAP25 on the PM and VAMP2 on the secretory granule.  
10 The priming function of MUNC18 is assisted by the DAG- and MAG-binding protein Munc13-1.  
11 Synaptotagmin VII clamps the quaternary complex at low  $\text{Ca}^{2+}$  and induces a conformational  
12 change in the complex in response to increases in intracellular  $\text{Ca}^{2+}$ . These changes culminate in  
13 the formation of a fusion pore through which insulin stored in secretory granules is released to the  
14 cell exterior<sup>1</sup>. These events are further regulated by other ancillary proteins, including complexin-  
15 2, which binds to VAMP2 to suppress synaptotagmin-induced granule fusion with the PM, and  
16 tomosyn which interacts with SNAP25 and syntaxin1A. At basal glucose levels, access of an  
17 intracellular pool of insulin containing secretory granules to the PM SNARE proteins is blocked by  
18 the cortical actin cytoskeleton. Stimulation with glucose induces remodelling of the actin  
19 cytoskeleton and subcortical actin network, allowing access of the intracellular pool of granules to  
20 the PM SNARE proteins, a process that is potentiated by fatty acids<sup>1,2</sup>.

## 22 **Supplementary Box 2. Mechanisms of cAMP signalling in $\beta$ -cells**

23 cAMP serves as both a priming factor required for normal glucose- and nutrient-stimulated insulin  
24 secretion, and as a potentiating agent that enhances insulin secretion at stimulatory glucose  
25 levels. Eliminating hormone-stimulated cAMP generation in  $\beta$ -cells by deletion of  $G\alpha_s$  produces  
26 insulin deficiency and hyperglycemia in mice<sup>3,4</sup>. In the absence of proglucagon-derived peptides,  
27 cAMP is increased in  $\beta$ -cells by two mechanisms, one dependent on  $\text{Ca}^{2+}$  and the other tied to  
28 changes in glucose metabolic rate. The operation of the  $\text{Ca}^{2+}$  mechanism was revealed in islets  
29 exposed to low, non-stimulatory glucose concentrations in the presence of the  $K_{\text{ATP}}$  channel  
30 opener diazoxide and a depolarizing concentration of  $\text{K}^+$ , which activates  $\text{Ca}^{2+}$  influx and  
31 increases cAMP levels. Addition of stimulatory glucose increases cAMP levels above those  
32 achieved with  $\text{K}^+$  and diazoxide treatment alone. This additional pathway may be tied to glucose  
33 metabolism-driven increases in ATP, the substrate of the cAMP generating adenylate cyclase  
34 enzymes, or possibly to a lowering of AMP, a cyclase inhibitor<sup>5,6</sup>.

35

36 Changes in  $\beta$ -cell cAMP translate to increases in insulin secretion by two main signalling nodes--  
37 activation of protein kinase A (PKA) and binding to Exchange Protein Activated by cAMP 2A  
38 (EPAC2A), a guanine nucleotide exchange factor<sup>5,6</sup>. Separate inhibition of these two nodes during  
39 dynamic insulin secretion in mouse islets revealed that the EPAC pathway potentiates first phase  
40 insulin secretion, while both PKA and EPAC contribute to second phase insulin secretion<sup>7</sup>.  
41 Activation of PKA results in phosphorylation of the SUR1 subunit of the  $K_{ATP}$  channel, as well as  
42 the Cav1/2 voltage-gated  $Ca^{2+}$  channel, contributing to inactivation of the former, and activation of  
43 the latter, thus enhancing  $Ca^{2+}$  influx and insulin secretion<sup>8</sup>. PKA subunits also bind to insulin  
44 secretory granules via association with A-kinase anchoring proteins, thereby becoming physically  
45 juxtaposed with multiple granule trafficking proteins<sup>9</sup>. Finally, glutamate uptake into secretory  
46 vesicles via the VGLUT1 transporter requires cAMP and activation of PKA, although the specific  
47 PKA substrates that mediate this effect have not been reported.

48

49 Signalling of cAMP through EPAC2A involves a separate set of events, initiated by cAMP binding  
50 to EPAC2A to cause a conformational change that facilitates interaction with Rap1, a small  
51 GTPase<sup>5</sup>. The Epac2A/Rap1 complex enhances recruitment of secretory granules to the readily  
52 releasable pool. Epac2A also interacts with Rim2 $\alpha$ , a Rab3-interacting protein that functions as a  
53 scaffold for proteins that mediate granule docking and fusion to the plasma membrane for  
54 exocytosis, and with Piccolo, which stabilizes the Epac2A/Rim2 $\alpha$  complex. All of these proteins  
55 (Epac2, Rim2 $\alpha$ , Piccolo and Rab3) are required for cAMP-regulated granule exocytosis<sup>5</sup>. Epac2  
56 also interacts with the  $K_{ATP}$  channel to alter its sensitivity to the inhibitory effects of ATP<sup>10</sup>.

57

58 Treatment of islets with proglucagon-derived peptides, or with the related gastrointestinal  
59 hormone GIP, leads to an increase in cAMP levels above those measured in the presence of  
60 stimulatory glucose alone. Cultured islets from proglucagon knockout mice have dramatic  
61 decreases in cAMP levels, accompanied by reduced phosphorylation of PKA substrates and  
62 impaired insulin secretion responses to all depolarizing stimuli, highlighting a critical role of  
63 proglucagon-derived peptides in driving  $\beta$ -cell cAMP signalling<sup>11</sup>. The extent to which the PKA-  
64 mediated versus the Epac2-mediated signalling pathways are engaged during stimulation with  
65 glucose alone versus with the combination of stimulatory glucose + hormones is not precisely  
66 defined and remains as an area for further investigation.

67

68

69

## References

70

71

1. Gaisano, H.Y. Recent new insights into the role of SNARE and associated proteins in insulin granule exocytosis. *Diabetes Obes Metab* **19 Suppl 1**, 115-123 (2017).

72

73

2. Ferdaoussi, M., *et al.* G protein-coupled receptor (GPR)40-dependent potentiation of insulin secretion in mouse islets is mediated by protein kinase D1. *Diabetologia* **55**, 2682-2692 (2012).

74

75

76

3. Xie, T., Chen, M. & Weinstein, L.S. Pancreas-specific G $\alpha$  deficiency has divergent effects on pancreatic alpha- and beta-cell proliferation. *J Endocrinol* **206**, 261-269 (2010).

77

78

79

4. Xie, T., Chen, M., Zhang, Q.H., Ma, Z. & Weinstein, L.S. Beta cell-specific deficiency of the stimulatory G protein alpha-subunit G $\alpha$  leads to reduced beta cell mass and insulin-deficient diabetes. *Proc Natl Acad Sci U S A* **104**, 19601-19606 (2007).

80

81

82

83

5. Seino, S., Sugawara, K., Yokoi, N. & Takahashi, H. beta-Cell signalling and insulin secretagogues: A path for improved diabetes therapy. *Diabetes Obes Metab* **19 Suppl 1**, 22-29 (2017).

84

85

86

6. Tengholm, A. & Gylfe, E. cAMP signalling in insulin and glucagon secretion. *Diabetes Obes Metab* **19 Suppl 1**, 42-53 (2017).

87

88

89

7. Henquin, J.C. & Nenquin, M. Activators of PKA and Epac distinctly influence insulin secretion and cytosolic Ca<sup>2+</sup> in female mouse islets stimulated by glucose and tolbutamide. *Endocrinology* **155**, 3274-3287 (2014).

90

91

8. Yang, H. & Yang, L. Targeting cAMP/PKA pathway for glycemic control and type 2 diabetes therapy. *J Mol Endocrinol* **57**, R93-R108 (2016).

92

93

94

9. Villalpando, S., Cazevielle, C., Fernandez, A., Lamb, N.J. & Hani, E.H. Type II PKAs are anchored to mature insulin secretory granules in INS-1 beta-cells and required for cAMP-dependent potentiation of exocytosis. *Biochimie* **125**, 32-41 (2016).

95

96

10. Gheni, G., *et al.* Glutamate acts as a key signal linking glucose metabolism to incretin/cAMP action to amplify insulin secretion. *Cell Rep* **9**, 661-673 (2014).

97

98

11. Capozzi, M.E., *et al.* beta Cell tone is defined by proglucagon peptides through cAMP signaling. *JCI Insight* **4**(2019).

98
